# Supplementary material
Source: PubMed Central journal article supplement (PMC10506419)
Supplement: NIHMS1925202-supplement-34270823_DH_SM3.pdf [file NIHMS1925202-supplement-34270823_DH_SM3.pdf]

**Supplemental Table 3: Peripheral Blood counts of GATA2 patients**

| Patient  | Age | Sex | WBC (K/mcL)                                   | Hemoglobin (g/dL)                            | MCV (fL)                                    | Platelet Count                                     | Neutrophils Abs (K/mcL)                     | Lymphocytes Abs (K/mcL)                     | Monocytes Abs (K/mcL)                       |
|----------|-----|-----|-----------------------------------------------|----------------------------------------------|---------------------------------------------|----------------------------------------------------|---------------------------------------------|---------------------------------------------|---------------------------------------------|
|          |     |     | Normal range<br>M: 4.23-9.07<br>F: 3.98-10.04 | Normal Range<br>M: 13.7-17.5<br>F: 11.2-15.7 | Normal Range<br>M:79.0-92.2<br>F: 79.4-94.8 | (K/mcL)<br>Normal Range<br>M:161-347<br>F: 173-369 | Normal Range<br>M:1.78-5.38<br>F: 1.56-6.13 | Normal Range<br>M:1.32-3.57<br>F: 1.18-3.74 | Normal Range<br>M:0.30-0.82<br>F: 0.24-0.86 |
| GATA2_1  | 15  | F   | 1.69                                          | 10.5                                         | 78.9                                        | 210                                                | 1.11                                        | 0.42                                        | 0.00                                        |
| GATA2_2  | 29  | F   | 2.94                                          | 8.9                                          | 94.1                                        | 260                                                | 2.47                                        | 0.41                                        | 0.01                                        |
| GATA2_3  | 53  | F   | 1.74                                          | 9.5                                          | 88.6                                        | 91                                                 | 1.19                                        | 0.46                                        | 0.05                                        |
| GATA2_4  | 34  | F   | 7.29                                          | 10.8                                         | 86.5                                        | 343                                                | 5.69                                        | 1.34                                        | 0.00                                        |
| GATA2_5  | 15  | F   | 2.09                                          | 11.0                                         | 88.6                                        | 366                                                | 1.38                                        | 0.55                                        | 0.00                                        |
| GATA2_6  | 22  | M   | 0.89                                          | 12.9                                         | 103.0                                       | 67                                                 | 0.58                                        | 0.15                                        | 0.00                                        |
| GATA2_7  | 26  | M   | 2.45                                          | 12.3                                         | 95.8                                        | 251                                                | 1.34                                        | 0.90                                        | 0.13                                        |
| GATA2_8  | 32  | M   | 1.81                                          | 10.6                                         | 97.3                                        | 113                                                | 0.79                                        | 1.00                                        | 0.01                                        |
| GATA2_9  | 45  | F   | 2.75                                          | 11.9                                         | 93.2                                        | 131                                                | 1.59                                        | 0.91                                        | 0.04                                        |
| GATA2_10 | 24  | F   | 5.85                                          | 7.3                                          | 77.6                                        | 202                                                | 2.60                                        | 1.01                                        | 0.06                                        |
| GATA2_11 | 17  | F   | 3.75                                          | 12.2                                         | 101.7                                       | 115                                                | 1.66                                        | 1.99                                        | 0.03                                        |
| GATA2_12 | 24  | F   | 1.38                                          | 8.8                                          | 101.0                                       | 132                                                | 0.54                                        | 0.81                                        | 0.01                                        |
| GATA2_13 | 15  | F   | 2.64                                          | 7.5                                          | 87.0                                        | 150                                                | 2.01                                        | 0.56                                        | 0.07                                        |
| GATA2_14 | 18  | F   | 1.39                                          | 7.9                                          | 90.9                                        | 106                                                | 0.74                                        | 0.64                                        | 0.00                                        |
| GATA2_15 | 31  | F   | 1.87                                          | 8.9                                          | 70.3                                        | 36                                                 | 1.48                                        | 0.16                                        | 0.00                                        |
| GATA2_16 | 30  | M   | 2.63                                          | 11.4                                         | 98.3                                        | 219                                                | 0.44                                        | 1.89                                        | 0.11                                        |
| GATA2_17 | 45  | M   | 1.77                                          | 7.2                                          | 105.1                                       | 21                                                 | 1.28                                        | 0.45                                        | 0.02                                        |
| GATA2_18 | 20  | F   | 1.67                                          | 8.4                                          | 96.4                                        | 84                                                 | 0.51                                        | 1.11                                        | 0.02                                        |
| GATA2_19 | 66  | F   | 2.10                                          | 10.7                                         | 94.3                                        | 119                                                | 1.44                                        | 0.54                                        | 0.03                                        |
| GATA2_20 | 32  | F   | 1.23                                          | 6.8                                          | 78.0                                        | 59                                                 | 0.82                                        | 0.37                                        | 0.02                                        |
| GATA2_21 | 36  | F   | 2.39                                          | 7.0                                          | 93.4                                        | 202                                                | 2.16                                        | 0.23                                        | 0.00                                        |
| GATA2_22 | 23  | M   | 1.96                                          | 8.9                                          | 100.7                                       | 152                                                | 0.89                                        | 1.06                                        | 0.00                                        |
| GATA2_23 | 32  | F   | 1.59                                          | 8.0                                          | 104.8                                       | 106                                                | 0.36                                        | 1.22                                        | 0.00                                        |
| GATA2_24 | 16  | M   | 1.90                                          | 12.6                                         | 94.0                                        | 208                                                | 0.52                                        | 1.33                                        | 0.04                                        |
| GATA2_25 | 38  | F   | 2.91                                          | 10.6                                         | 94.1                                        | 238                                                | 1.92                                        | 0.89                                        | 0.03                                        |
| GATA2_26 | 20  | F   | 2.58                                          | 7.7                                          | 93.1                                        | 67                                                 | 1.80                                        | 0.73                                        | 0.00                                        |
| GATA2_27 | 42  | F   | 1.12                                          | 12.6                                         | 103.5                                       | 127                                                | 0.50                                        | 0.56                                        | 0.01                                        |
| GATA2_28 | 21  | F   | 2.17                                          | 7.5                                          | 93.1                                        | 240                                                | 1.38                                        | 0.76                                        | 0.00                                        |
| GATA2_29 | 52  | M   | 1.85                                          | 13.6                                         | 87.0                                        | 66                                                 | 1.15                                        | 0.65                                        | 0.00                                        |
| GATA2_30 | 38  | M   | 1.34                                          | 9.0                                          | 102.7                                       | 75                                                 | 0.54                                        | 0.77                                        | 0.00                                        |
| GATA2_31 | 10  | F   | 3.40                                          | 11.5                                         | 86.7                                        | 220                                                | 1.60                                        | 1.70                                        | 0.06                                        |
| GATA2_32 | 17  | M   | 5.46                                          | 15.9                                         | 91.7                                        | 208                                                | 2.52                                        | 2.47                                        | 0.36                                        |
| GATA2_33 | 37  | F   | 2.91                                          | 11.8                                         | 100.9                                       | 276                                                | 2.25                                        | 0.53                                        | 0.02                                        |
| GATA2_34 | 22  | F   | 11.28                                         | 10.0                                         | 80.0                                        | 310                                                | 10.30                                       | 0.64                                        | 0.02                                        |
